# Supplementary material for: A secondary structure within small peptides guiding spontaneous self-aggregation and nanoparticle formation
Source: Royal Society of Chemistry journal article supplement (doi:10.1039/d4na00614c), 2024-11-20
Supplement: d4na00614c2.pdf [file d4na00614c2.pdf]

## SUPPLEMENTAL MATERIAL

**Supplementary Figure 1. Purification of SAP1- $\alpha$ -EGFP nanoparticles.** (A) Workflow for the purification of SAP1- $\alpha$ -EGFP nanoparticles. (B) Coomassie-stained SDS-PAGE gel showing EGFP (used as control) and purified SAP1- $\alpha$ -EGFP. (C) Western blot demonstrating immunodetection of EGFP and SAP1- $\alpha$  in SAP1- $\alpha$ -EGFP. EGFP was used as positive and negative controls, respectively.

**Supplementary Figure 2. In-silico AlphaFold prediction of the molecular arrangements of the SAPs in the nanoparticles.** (A) PH(81-110)-EGFP (B) SAP1-EGFP, (C) SAP1- $\alpha$ -EGFP, and (D) SAP1- $\beta$ -EGFP. The  $\alpha$ -helix depicted in purple and  $\beta$ -strand in yellow. EGFP is depicted in green as surface. Notice all 3 SAPs are located at the center (core) of the nanoparticle.

**Supplementary figure 3. In-silico AlphaFold prediction showing the arrangement of SAP1- $\beta$ -EGFP in the nanoparticles.** (A) SAP1- $\beta$ -EGFP nanoparticles composed of 18 protein subunits (scale shows 5 nm). EGFP shown in green and  $\beta$ -strand in yellow. (B) Arrangement of the  $\beta$ -strands present at the center of the core region of the nanoparticle. (C) Surface analysis depicting the hydrophobicity profile of the SAP1- $\beta$  core. (D) Localization of a single  $\beta$ -strand in the SAP1- $\beta$  core. (E) Spatial orientation of a single  $\beta$ -strand showing the distribution of its hydrophobic and hydrophilic amino acids.
